# Supplementary material for: Climate-driven interannual variability of water scarcity in food production potential: a global analysis
Source: Copernicus journal article supplement (doi:10.5194/hess-18-447-2014), 2014-02-05
Supplement: Supplementary file 1 [file hess-18-447-2014-supplement.pdf]

## Online supplement

Kummu et al: Climate-driven interannual variability of water scarcity in food production: a global analysis

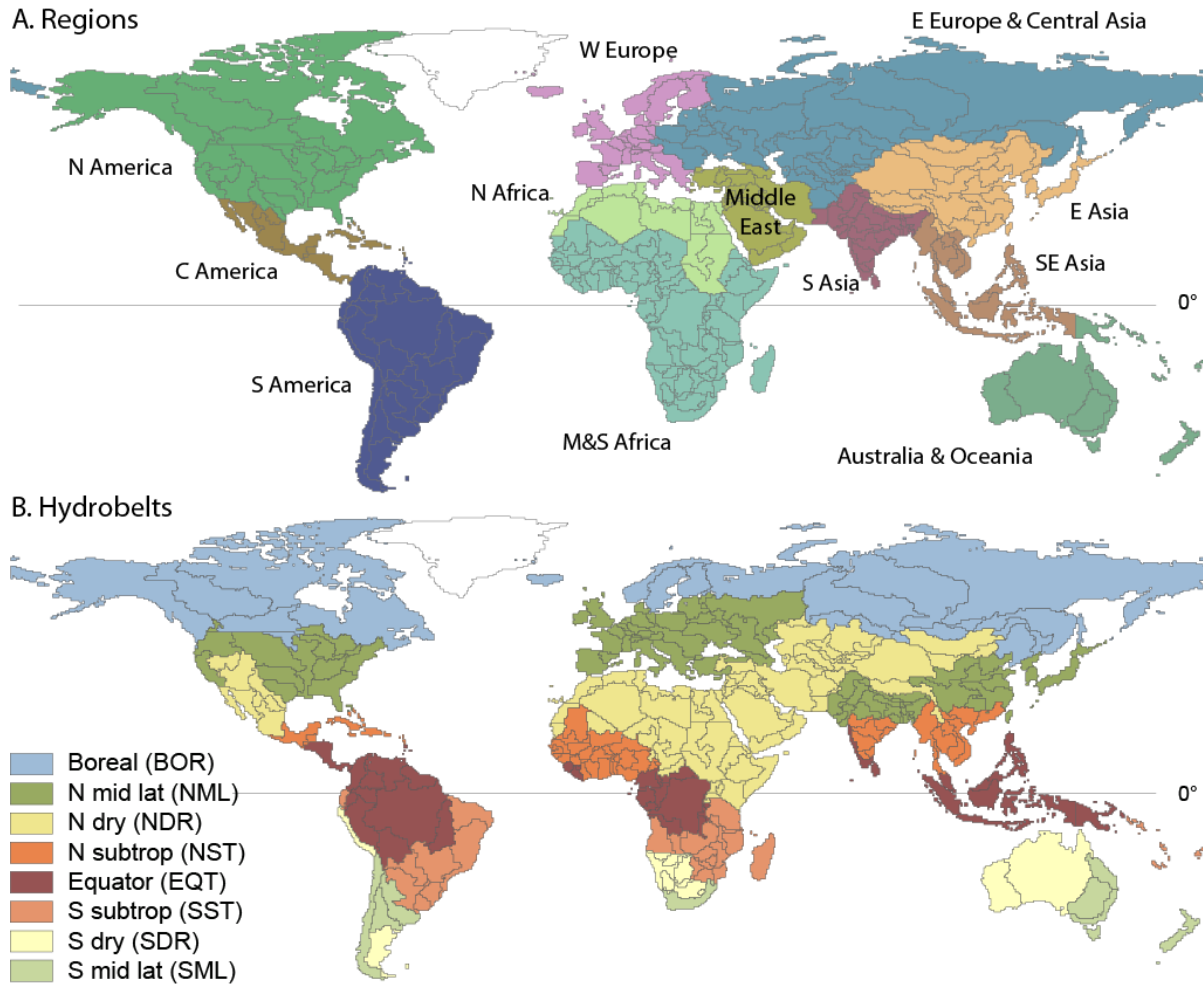

Fig S1. Division of FPUs to A: administrative regions (United Nations, 2000; Kummu et al., 2010) and B: hydrolbelts (Meybeck et al., 2013). Note: the hydrolbelt boundaries differ here slightly from the original, as hydrolbelts crossed some FPU borders, and thus each FPU was aggregated to a hydrolbelt with largest share in that FPU in question.

Table S1. Regional results for green-blue water scarcity frequency; See illustrations in Fig 3A in the main paper.

| Region                          | Population           | 0%         | 0-25%     | 25-50%    | 50-75%    | 75-100%   | 100%       | Grand Total |
|---------------------------------|----------------------|------------|-----------|-----------|-----------|-----------|------------|-------------|
| Australia and Oceania           | 29,198,205           | 100%       |           |           |           |           |            | 100%        |
| Central America                 | 169,414,768          | 90%        |           | 10%       |           |           |            | 100%        |
| Eastern Asia                    | 1,484,822,477        | 57%        | 5%        | 5%        | 10%       | 7%        | 17%        | 100%        |
| Eastern Europe and Central Asia | 391,175,459          | 85%        | 1%        |           | 5%        | 2%        | 7%         | 100%        |
| Latin America                   | 348,256,247          | 93%        |           | 1%        |           | 6%        |            | 100%        |
| Middle and Southern Africa      | 605,305,081          | 54%        | 13%       | 4%        | 5%        | 12%       | 12%        | 100%        |
| Middle East                     | 257,268,709          | 24%        | 2%        |           |           | 6%        | 68%        | 100%        |
| North Africa                    | 173,300,517          | 16%        | 32%       | 1%        | 0%        | 25%       | 26%        | 100%        |
| North America                   | 309,635,372          | 100%       |           |           |           |           |            | 100%        |
| South Asia                      | 1,345,367,745        | 10%        | 8%        | 6%        | 1%        | 8%        | 66%        | 100%        |
| Southeastern Asia               | 517,658,581          | 99%        |           |           |           |           | 1%         | 100%        |
| Western Europe                  | 410,875,355          | 98%        | 2%        |           |           |           |            | 100%        |
| <b>Grand Total</b>              | <b>6,042,278,516</b> | <b>57%</b> | <b>5%</b> | <b>3%</b> | <b>4%</b> | <b>6%</b> | <b>24%</b> | <b>100%</b> |

Table S2. Results by hydrobelts for green-blue water scarcity frequency; See illustrations in Fig 3B in the main paper.

| Hydrobelt             | Population           | 0%         | 0-25%     | 25-50%    | 50-75%    | 75-100%   | 100%       | Grand Total |
|-----------------------|----------------------|------------|-----------|-----------|-----------|-----------|------------|-------------|
| Boreal                | 210,586,285          | 100%       |           | 0%        |           |           |            | 100%        |
| Northern Mid Latitude | 3,050,054,031        | 51%        | 4%        | 5%        | 4%        | 4%        | 32%        | 100%        |
| Norther Dry           | 727,553,475          | 25%        | 11%       | 1%        | 10%       | 16%       | 37%        | 100%        |
| Norther Sub-Tropical  | 1,007,074,982        | 59%        | 6%        | 3%        | 2%        | 11%       | 19%        | 100%        |
| Equator               | 604,513,955          | 97%        |           | 1%        |           |           | 3%         | 100%        |
| Souther Sub-Tropical  | 342,816,490          | 78%        | 12%       | 1%        |           | 5%        | 3%         | 100%        |
| Southern Dry          | 35,180,354           | 36%        | 4%        |           |           | 56%       | 4%         | 100%        |
| Souther Mid Latitude  | 64,498,944           | 71%        | 27%       | 1%        |           |           |            | 100%        |
| <b>Grand Total</b>    | <b>6,042,278,516</b> | <b>57%</b> | <b>5%</b> | <b>3%</b> | <b>4%</b> | <b>6%</b> | <b>24%</b> | <b>100%</b> |

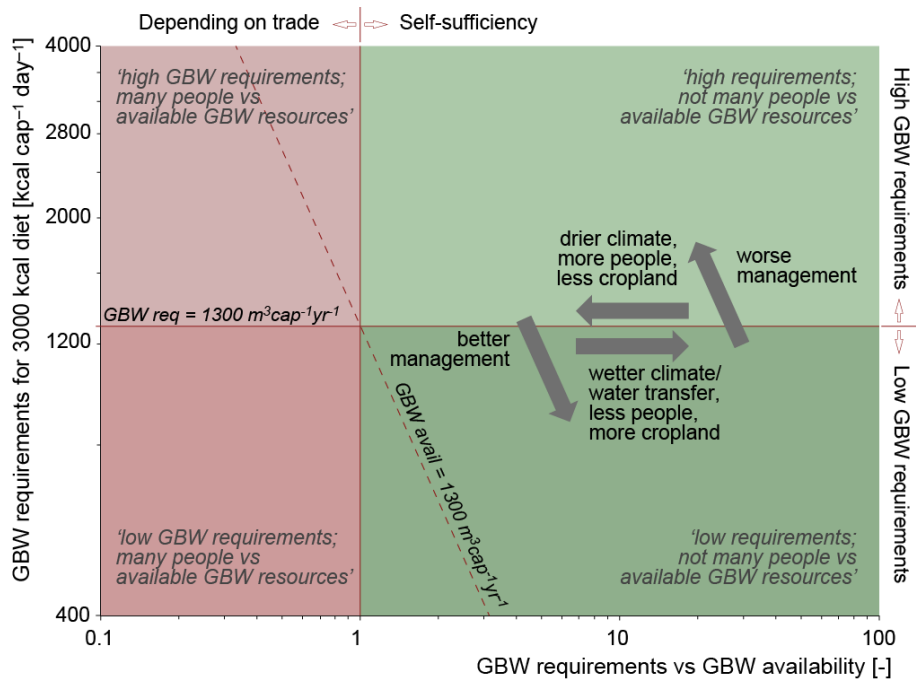

Fig S2. Green-blue water (GBW) matrix. Green-blue water (GBW) requirements for the reference diet is at y-axis and GBW availability ratio (i.e. GBW availability vs GBW requirements) at x-axis. When the GBW requirements are higher than the GBW availability ( $x$ -axis  $< 1$ ), an area is considered to be under GBW scarcity. The dashed red line re-presents the threshold for GBW scarcity in Rockström et al. (2009), i.e. GBW availability of  $1300 \text{ m}^3 \text{ cap}^{-1} \text{ yr}^{-1}$ , and thus provides a comparison to their method. Note: log10 scale in both axes.

## References

*Kummu, M., Ward, P. J., de Moel, H., and Varis, O.: Is physical water scarcity a new phenomenon? Global assessment of water shortage over the last two millennia, Environmental Research Letters, 5, 034006, 10.1088/1748-9326/5/3/034006, 2010.*

*Meybeck, M., Kummu, M., and Dürr, H. H.: Global hydrobelts and hydroregions: improved reporting scale for water-related issues?, Hydrol. Earth Syst. Sci., 17, 1093-1111, 10.5194/hess-17-1093-2013, 2013.*

*Rockström, J., Falkenmark, M., Karlberg, L., Hoff, H., Rost, S., and Gerten, D.: Future water availability for global food production: The potential of green water for increasing resilience to global change, Water Resour Res, 45, W00A12, doi:10.1029/2007WR006767 2009.*
